# Supplementary material for: Effectiveness of a multicomponent intervention to face the COVID-19 pandemic in Rio de Janeiro’s favelas: difference-in-differences analysis
Source: HighWire-hosted journal article supplement (doi:10.1136/bmjgh-2022-009997), 2023-05-01
Supplement: bmjgh-2022-009997supp001_data_supplement.pdf [file bmjgh-2022-009997supp001_data_supplement.pdf]

## Effectiveness of a multi-component intervention to face the COVID-19 pandemic in Rio de Janeiro's Favelas: Difference-in-Differences analysis

### Supplementary data

#### Contents

|                                                                                                                                                                                                           |   |
|-----------------------------------------------------------------------------------------------------------------------------------------------------------------------------------------------------------|---|
| <i>Text. Institutions responsible for the multi-component intervention</i> .....                                                                                                                          | 2 |
| <i>Supplementary Method (sMethod). Difference-in-differences analysis</i> .....                                                                                                                           | 3 |
| <i>Table A. Socioeconomic indicators</i> .....                                                                                                                                                            | 4 |
| <i>Table B. Relative change of pandemic indicators comparing before and after the intervention for each favela in the control group (Rocinha, Cidade de Deus, Mangueira)</i> .....                        | 5 |
| <i>Table C. Comparison of Age group and Sex distribution between intervention group (Maré) and the control group</i> .....                                                                                | 6 |
| <i>Table D. Demographics of COVID-19 deaths reported in the intervention (Maré) and the control groups (Rocinha, Cidade de Deus, Mangueira) comparing before and after the intervention periods</i> ..... | 7 |
| <i>Table E. Demographics of Maré residents tested in the community from September 2020 to April 2021</i> .....                                                                                            | 8 |

*Text. Institutions responsible for the multi-component intervention*

**Fundação Oswaldo Cruz (Fiocruz):** Fiocruz is the most traditional research institution on infectious diseases in Latin America, with more than 120 years of activity. Fiocruz works in research, production of inputs (vaccines, diagnostic kits, and medicines), human resources training, and innovation. Additionally, Fiocruz has several reference laboratories for infectious diseases and technological platforms that support research and innovation. More than 100 million vaccine doses were produced in 2019, and over 300,000 tests performed in reference laboratories. Fiocruz also has 1,700 doctors on staff and 323 research lines registered. Fiocruz has historically supported projects in favelas and vulnerable communities, which was intensified during the COVID-19 pandemic.

**Redes da Maré:** Redes da Maré is a civil society institution that produces knowledge, projects, and actions to ensure adequate public policies to improve the lives of 140,000 residents of Maré's 16 favelas. Redes da Maré works to increase the quality of life, in an attempt to guarantee the fundamental rights of Maré population.

**Saúde, Alegria e Sustentabilidade Brasil (SAS Brasil):** SAS Brasil is a nonprofit health institution created in 2013 that, in response to the COVID-19 pandemic, was offering clinical and psychological care through teleconsultations, targeting low-income populations. The SAS telemedicine project began in March 2020, involving more than 430 healthcare volunteers, distributed among 22 different medical and seven nonmedical specialties, and also performed remote consultations through their own system.

**Dados do Bem (DdB):** DdB is an epidemiological monitoring project that brings together geolocation technology and methodology for real-time follow-up coronavirus evolution in urban centers. The tool generates a virus distribution map and strategic data about Covid-19 for decision-making by the authorities. Initially developed as part of a research, DdB was created by infectious disease specialists and an intelligence team, provided free of charge to the government.

**Conselho Comunitário de Manguinhos:** Conselho Comunitário de Manguinhos is a neighbourhood council that aims to contribute to the sustainable development of the communities around Manguinhos. It is an autonomous body that promotes actions and debates between residents, private, governmental, and socio-community institutions.

**União Rio:** União Rio is a voluntary movement of civil society in Rio de Janeiro that brings together people, companies, and non-governmental organizations to preserve lives. They raise the main demands in the health area and other issues concerning vulnerable communities in order to reduce the impacts of the Covid-19 pandemic.

*Supplementary Method (sMethod). Difference-in-differences analysis*

**Missing values:** To describe patients' clinical characteristics, outcomes, and organ support, we provided their corresponding number of complete cases for incomplete variables. No imputation method was performed.

Difference-in-differences (DID) modeling: Our data comprised weekly rates of reported cases and deaths in the intervention group (Maré) and the control group (a combination of Rocinha, Cidade de Deus, and Mangueira).

To estimate the effect of the multi-component intervention, we obtained the classic difference-in-difference estimator using a Negative Binomial regression model.

**Outcome:** Reported number of cases and deaths per 100,000 population per age and sex

Multivariable Negative binomial regression model: As our outcomes are rates, defined as the ratio between a count variable (number of events) and a denominator (population), we modeled them using a Negative binomial distribution assumption in the regression. The multivariable model syntax is defined as:

*Outcome<sub>age\_strata</sub> (count) ~ Intervention/Control indicator + Period indicator + Intervention/Control indicator \* Period indicator + Age group + Sex + offset(log(population<sub>age\_strata</sub>))*

This model syntax means that the outcome (number of events) was explained by the indicator of the intervention (Maré) or control group, the period of intervention onset (before or after), an interaction term between the groups and the period, the age, and the sex groups. We included the log(population) as an offset variable (slope = 1) to model the outcome's denominator for the rate.

The DID estimator corresponds to the coefficient of the interaction term (intervention group \* period). However, in the Negative Binomial regression, this estimate is in log scale. Hence, we obtained the DID estimator as the Rate of Rate Ratios (RRR), defined as the exp(estimate).

Table A. Socioeconomic indicators

|                                                     | Rio de Janeiro<br>Capital | Intervention<br>group<br>(Maré) | Control group<br>(Rocinha, Cidade de Deus,<br>Mangueira) | Rocinha | Cidade de<br>Deus | Mangueira |
|-----------------------------------------------------|---------------------------|---------------------------------|----------------------------------------------------------|---------|-------------------|-----------|
| <b>Population</b>                                   | 6,320,446                 | 129,770                         | 123,706                                                  | 69,356  | 36,515            | 17,835    |
| <b>Population density (person / km<sup>2</sup>)</b> | 15,816                    | 73,090                          | 68,073                                                   | 79,031  | 35,283            | 25,094    |
| <b>Age group, years</b>                             |                           |                                 |                                                          |         |                   |           |
| 0 – 9                                               | 759,791                   | 21,260                          | 20,264                                                   | 11,349  | 5,743             | 3,172     |
| 10 – 19                                             | 930,717                   | 23,473                          | 21,980                                                   | 11,876  | 6,747             | 3,357     |
| 20 – 29                                             | 1,059,810                 | 25,746                          | 25,422                                                   | 15,852  | 6,222             | 3,348     |
| 30 – 39                                             | 992,986                   | 22,951                          | 20,629                                                   | 12,659  | 5,456             | 2,514     |
| 40 – 49                                             | 876,487                   | 16,514                          | 15,602                                                   | 8,315   | 5,134             | 2,153     |
| 50 – 59                                             | 759,804                   | 10,800                          | 10,531                                                   | 5,404   | 3,413             | 1,714     |
| 60+                                                 | 940,851                   | 9,026                           | 9,278                                                    | 3,901   | 3,800             | 1,577     |
| <b>Sex</b>                                          |                           |                                 |                                                          |         |                   |           |
| Female                                              | 3,360,629                 | 66,027                          | 63,943                                                   | 35,144  | 19,326            | 9,473     |
| Male                                                | 2,959,817                 | 63,743                          | 59,763                                                   | 34,212  | 17,189            | 8,362     |
| <b>Income per person*</b>                           | \$ 165.33                 | \$79.16                         | \$84.19                                                  | \$81.76 | \$89.78           | \$82.16   |
| <b>SPI</b>                                          | 0.609                     | 0.547                           | 0.541                                                    | 0.533   | 0.559             | 0.537     |
| <b>HDI index</b>                                    | 0.771                     | 0.686                           | 0.660                                                    | 0.663   | 0.67              | 0.628     |
| <b>HDI education</b>                                | 0.673                     | 0.510                           | 0.481                                                    | 0.461   | 0.543             | 0.429     |

\*\$1.00 = R\$ 4.99

*Table B. Relative change of pandemic indicators comparing before and after the intervention for each favela in the control group (Rocinha, Cidade de Deus, Mangueira)*

| Local                                         | Before intervention<br>(Mar/2020 – Sep/2020) | After intervention<br>(Sep/2020 – Apr/2021) | Relative Change |
|-----------------------------------------------|----------------------------------------------|---------------------------------------------|-----------------|
| <b>Rocinha</b>                                |                                              |                                             |                 |
| Cases                                         | 952                                          | 1872                                        | 97%             |
| Standardised cases per 100,000                | 84                                           | 99                                          | 18%             |
| Average Standardised cases/100,000 per week*  | 104 (27.0)                                   | 109 (23.0)                                  | 5%              |
| Deaths                                        | 80                                           | 45                                          | -44%            |
| Standardised Deaths per 100,000               | 7                                            | 2                                           | -71%            |
| Average Standardised deaths/100,000 per week* | 15 (8.1)                                     | 5 (2.3)                                     | -67%            |
| Standardised Case-fatality ratio              | 8.9%                                         | 3.3%                                        | -62%            |
| <b>Cidade de Deus</b>                         |                                              |                                             |                 |
| Cases                                         | 375                                          | 704                                         | 88%             |
| Standardised cases per 100,000                | 96                                           | 100                                         | 4%              |
| Average Standardised cases/100,000 per week*  | 99 (15.7)                                    | 103 (13.2)                                  | 4%              |
| Deaths                                        | 79                                           | 75                                          | -5%             |
| Standardised Deaths per 100,000               | 20                                           | 11                                          | -45%            |
| Average Standardised deaths/100,000 per week* | 23 (7.6)                                     | 15 (3.9)                                    | -35%            |
| Standardised Case-fatality ratio              | 18.1%                                        | 9.3%                                        | -49%            |
| <b>Mangueira</b>                              |                                              |                                             |                 |
| Cases                                         | 201                                          | 362                                         | 80%             |
| Standardised cases per 100,000                | 151                                          | 152                                         | 1%              |
| Average Standardised cases/100,000 per week*  | 154 (27.0)                                   | 156 (21.0)                                  | 1%              |
| Deaths                                        | 29                                           | 16                                          | -45%            |
| Standardised Deaths per 100,000               | 22                                           | 7                                           | -68%            |
| Average Standardised deaths/100,000 per week* | 24 (12.2)                                    | 9 (5.4)                                     | -63%            |
| Standardised Case-fatality ratio              | 15.6%                                        | 4.2%                                        | -73%            |

\*Mean (SD)

Table C. Comparison of Age group and Sex distribution between intervention group (Maré) and the control group

|                         | Intervention group (Maré) | Control group (Rocinha, Cidade de Deus, Mangueira) | SMD   |
|-------------------------|---------------------------|----------------------------------------------------|-------|
| <b>Age group, years</b> |                           |                                                    | 0.037 |
| 0 – 9                   | 21,260 (16.4%)            | 20,264 (16.4%)                                     |       |
| 10 – 19                 | 23,473 (18.1%)            | 21,980 (17.8%)                                     |       |
| 20 – 29                 | 25,746 (19.8%)            | 25,422 (20.6%)                                     |       |
| 30 – 39                 | 22,951 (17.7%)            | 20,629 (16.7%)                                     |       |
| 40 – 49                 | 16,514 (12.7%)            | 15,602 (12.6%)                                     |       |
| 50 – 59                 | 10,800 (8.3%)             | 10,531 (8.5%)                                      |       |
| 60+                     | 9,026 (7.0%)              | 9,278 (7.5%)                                       |       |
| <b>Sex</b>              |                           |                                                    | 0.016 |
| Female                  | 66,027 (50.9%)            | 63,943 (51.7%)                                     |       |
| Male                    | 63,743 (49.1%)            | 59,763 (48.3%)                                     |       |

SMD: Standardised Mean Differences

Table D. Demographics of COVID-19 deaths reported in the intervention (Maré) and the control groups (Rocinha, Cidade de Deus, Mangueira) comparing before and after the intervention periods

| Characteristic          | Intervention group (Maré)     |                                           |                                         |                 | Control group (Rocinha, Cidade de Deus, Mangueira) |                                           |                                          |                 |
|-------------------------|-------------------------------|-------------------------------------------|-----------------------------------------|-----------------|----------------------------------------------------|-------------------------------------------|------------------------------------------|-----------------|
|                         | Overall, N = 279 <sup>1</sup> | Before intervention, N = 199 <sup>1</sup> | After intervention, N = 80 <sup>1</sup> | Relative change | Overall, N = 324 <sup>1</sup>                      | Before intervention, N = 188 <sup>1</sup> | After intervention, N = 136 <sup>1</sup> | Relative change |
| <b>Age group, years</b> |                               |                                           |                                         |                 |                                                    |                                           |                                          |                 |
| 0-39                    | 28 (10.0%)                    | 20 (10.1%)                                | 8 (10.0%)                               | -60%            | 24 (7.4%)                                          | 11 (5.9%)                                 | 13 (9.6%)                                | 18%             |
| 40-59                   | 76 (27.2%)                    | 52 (26.1%)                                | 24 (30.0%)                              | -54%            | 84 (25.9%)                                         | 52 (27.7%)                                | 32 (23.5%)                               | -38%            |
| 60+                     | 175 (62.7%)                   | 127 (63.8%)                               | 48 (60.0%)                              | -62%            | 216 (66.7%)                                        | 125 (66.5%)                               | 91 (66.9%)                               | -27%            |
| <b>Sex</b>              |                               |                                           |                                         |                 |                                                    |                                           |                                          |                 |
| Female                  | 130 (46.6%)                   | 83 (41.7%)                                | 47 (58.8%)                              | -43%            | 174 (53.7%)                                        | 95 (50.5%)                                | 79 (58.1%)                               | -17%            |
| Male                    | 149 (53.4%)                   | 116 (58.3%)                               | 33 (41.2%)                              | -72%            | 150 (46.3%)                                        | 93 (49.5%)                                | 57 (41.9%)                               | -39%            |

<sup>1</sup>n (%)

Table E. Demographics of Maré residents tested in the community from September 2020 to April 2021

| Characteristic                | Overall, N = 29,592 <sup>1</sup> | Positive, N = 3,478 <sup>1</sup> | Negative, N = 26,114 <sup>1</sup> |
|-------------------------------|----------------------------------|----------------------------------|-----------------------------------|
| Sex                           |                                  |                                  |                                   |
| Female                        | 18,612 (63%)                     | 2,124 (61%)                      | 16,488 (63%)                      |
| Male                          | 10,980 (37%)                     | 1,354 (39%)                      | 9,626 (37%)                       |
| Age group, years              |                                  |                                  |                                   |
| <20                           | 2,214 (7.5%)                     | 280 (8.1%)                       | 1,934 (7.4%)                      |
| 20-29                         | 5,766 (19%)                      | 648 (19%)                        | 5,118 (20%)                       |
| 30-39                         | 6,802 (23%)                      | 888 (26%)                        | 5,914 (23%)                       |
| 40-49                         | 6,194 (21%)                      | 744 (21%)                        | 5,450 (21%)                       |
| 50-59                         | 4,888 (17%)                      | 552 (16%)                        | 4,336 (17%)                       |
| 60+                           | 3,728 (13%)                      | 366 (11%)                        | 3,362 (13%)                       |
| Self-reported race            |                                  |                                  |                                   |
| Black or Brown                | 16,414 (65%)                     | 1,950 (64%)                      | 14,464 (65%)                      |
| White                         | 8,200 (32%)                      | 1,016 (33%)                      | 7,184 (32%)                       |
| Asian                         | 588 (2.3%)                       | 58 (1.9%)                        | 530 (2.4%)                        |
| Indigenous                    | 134 (0.5%)                       | 10 (0.3%)                        | 124 (0.6%)                        |
| NA                            | 4,256                            | 444                              | 3,812                             |
| Healthcare workers            | 1,978 (6.7%)                     | 200 (5.8%)                       | 1,778 (6.8%)                      |
| Previous positive test result | 2,792 (9.4%)                     | 158 (4.5%)                       | 2,634 (10%)                       |
| NA                            | 2                                | 0                                | 2                                 |

<sup>1</sup>n (%)
